# Supplementary material for: Steroid Metabolomic Signature in Term and Preterm Infants
Source: MDPI journal article supplement (doi:10.3390/biom14020235), 2024-02-17
Supplement: s1 [file s1]

**Suppl. Table S2A.** Graphical representation of the daily urinary steroid metabolome in term infants (> 37 weeks gestational age). Steroids are shown divided into six excretion rate ranges (median, µg/kg/d) illustrating their relative contribution to the total circulating steroid pool.

|                                                                                             |                                                                                               |                                                                                               |                                                                                                                                      |                                                                                                |                                                                                                                                                                  |
|---------------------------------------------------------------------------------------------|-----------------------------------------------------------------------------------------------|-----------------------------------------------------------------------------------------------|--------------------------------------------------------------------------------------------------------------------------------------|------------------------------------------------------------------------------------------------|------------------------------------------------------------------------------------------------------------------------------------------------------------------|
| 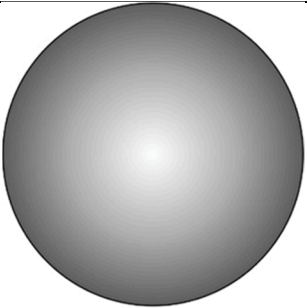<br>> 1000 | <br>500-1000 | <br>200-500 | <br>100-200                                       | <br>10-99   | <br><10                                                                       |
| A5-3β16α17β18-tetrol                                                                        | P5-3β20α21-triol                                                                              | 16α-OH-DHEA<br><br>16OHP5o                                                                    | 6α-OH-β-Cl<br><br>16β-OH-DHEA<br>15β,16αOH-DHEA<br>16-O-A5D<br>A5T16α<br>16α,18OH-DHEA<br>A5-3β15β16α17β-tetrol<br><br>P5-tetrol-15β | F<br><br>THE<br>6α-OH-THE<br>β-Cl<br>6α-OH-α-Cl<br><br>15β,17OHP5o<br><br>21OHP5o<br>P5-tetrol | THF<br>6β-OH-F<br><br>1β-OH-THE<br>1β-OH-β-Cl<br>THA<br><br>11-O-An<br>11-OH-An<br><br>A5-3b,17a<br>DHEA<br>Adiol<br><br>17OHPo<br>17OHPo-5α<br>15b,17OHPo<br>PT |

**Suppl. Table S2B.** Graphical representation of the daily urinary steroid metabolome in preterm infants (30-36 weeks gestational age). Steroids are shown divided into six excretion rate ranges (median,  $\mu\text{g/kg/d}$ ) illustrating their relative contribution to the total circulating steroid pool. \* different contribution compared to terms

| 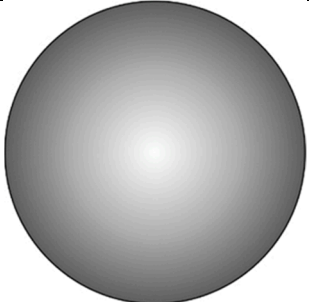<br>> 1000 | <br>500-1000                | <br>200-500 | <br>100-200                                                                     | <br>10-99                                                                | <br><10                                                                                                                                                         |
|---------------------------------------------------------------------------------------------|--------------------------------------------------------------------------------------------------------------|-----------------------------------------------------------------------------------------------|--------------------------------------------------------------------------------------------------------------------------------------------------------------------|-------------------------------------------------------------------------------------------------------------------------------------------------------------|----------------------------------------------------------------------------------------------------------------------------------------------------------------------------------------------------------------------------------------------------|
|                                                                                             | P5-3 $\beta$ 20 $\alpha$ 21-triol<br>16 $\alpha$ -OH-DHEA*<br>A5-3 $\beta$ 16 $\alpha$ 17 $\beta$ 18-tetrol* | 16OHP5o<br>16-O-A5D*<br>A5T16a*<br>P5-tetrol-15 $\beta$ *                                     | 6 $\alpha$ -OH- $\beta$ -Cl<br><br>16 $\beta$ -OH-DHEA<br>16 $\alpha$ ,18OH-DHEA<br>A5-3 $\beta$ 15 $\beta$ 16 $\alpha$ 17 $\beta$ -tetrol<br>15 $\beta$ ,17OHP5o* | THE<br>6 $\alpha$ -OH-THE<br>$\alpha$ -Cl<br>$\beta$ -Cl<br>6 $\beta$ -OH- $\alpha$ -Cl<br><br>15 $\beta$ ,16 $\alpha$ OH-DHEA*<br><br>21OHP5o<br>P5-tetrol | F*<br>6 $\beta$ -OH-F<br><br>1 $\beta$ -OH-THE<br>1 $\beta$ -OH- $\beta$ -Cl<br>THA<br><br>THS*<br>11-O-An<br>11-OH-An<br>A5-3 $\beta$ ,17 $\alpha$<br>DHEA<br>Adiol<br>A5T16 $\beta$ *<br>17OHPo<br>17OHPo-5 $\alpha$<br>15 $\beta$ ,17OHPo<br>PT |

**Suppl. Table S2C.** Graphical representation of the daily urinary steroid metabolome in early preterm infants (<30 weeks gestational age). Steroids are shown divided into six excretion rate ranges (median, µg/kg/d) illustrating their relative contribution to the total circulating steroid pool. \* different contribution compared to terms

| 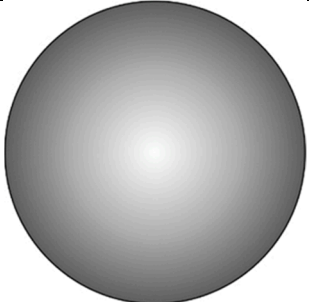<br>> 1000 | <br>500-1000 | <br>200-500                       | <br>100-200 | <br>10-99 | <br><10                                                                      |
|---------------------------------------------------------------------------------------------|-----------------------------------------------------------------------------------------------|---------------------------------------------------------------------------------------------------------------------|------------------------------------------------------------------------------------------------|----------------------------------------------------------------------------------------------|-----------------------------------------------------------------------------------------------------------------------------------------------------------------|
| A5-3β16α17β18-tetrol                                                                        | 16α-OH-DHEA*                                                                                  | 16-O-A5D*<br>A5T16α*<br>16α,18OH-DHEA*<br>A5-3β15β16α17β-tetrol*<br>16OHP5o*<br>P5-tetrol-15b*<br>P5-3β20α21-triol* | 6α-OH-β-Cl<br><br>16β-OH-DHEA<br>15β,17OHP5o*<br>15β,16αOH-DHEA<br>P5-tetrol*                  | F<br>6β-OH-F*<br>THE<br>α-Cl<br>β-Cl<br>6α-OH-α-Cl<br><br>21OHP5o                            | 6α-OH-THE*<br>1β-OH-β-Cl<br>20α-DHF*<br>THA*<br>THS*<br><br>11-O-An<br>11-OH-An<br><br>A5-3β,17α<br>DHEA<br>A5T-16β*<br>17OHPo<br>17OHPo-5α<br>15β,17OHPo<br>PT |
