# Supplementary material for: Steroid Metabolomic Signature in Term and Preterm Infants
Source: MDPI journal article supplement (doi:10.3390/biom14020235), 2024-02-17
Supplement: s1 [file s1]

**Suppl. Table S1.** List of the urinary steroid metabolites and their origin analyzed in term, preterm and early preterm infants.

| Abbreviation                                           | Urinary Steroid Metabolite                                                                 | Origin of Urinary Steroid |
|--------------------------------------------------------|--------------------------------------------------------------------------------------------|---------------------------|
| THS                                                    | 5 $\beta$ -Pregnane-3 $\alpha$ ,17,21-triol-20-one                                         | 11-deoxycortisol          |
| 15 $\beta$ ,17OH-P5o                                   | 5-Pregnene-3 $\beta$ ,15 $\beta$ ,17-triol-20-one                                          | 17-hydroxypregnenolone    |
| P5-tetrol-15 $\beta$                                   | 5-Pregnene-3 $\beta$ ,15 $\beta$ ,17,20 $\alpha$ -tetrol                                   | 17-hydroxypregnenolone    |
| 17OHPo                                                 | 5 $\beta$ -Pregnane-3 $\alpha$ ,17-diol-20-one<br>(17-OHPregnanolone)                      | 17-hydroxyprogesterone    |
| 17OHPo-5 $\alpha$                                      | 5 $\alpha$ -Pregnane-3 $\alpha$ ,17-diol-20-one                                            | 17-hydroxyprogesterone    |
| 15 $\beta$ ,17OHPo                                     | 5 $\beta$ -Pregnan-3 $\alpha$ ,15 $\beta$ ,17-triol-20-one                                 | 17-hydroxyprogesterone    |
| PT                                                     | 5 $\beta$ -Pregnane-3 $\alpha$ ,17, 20 $\alpha$ -triol<br>(Pregnanetriol)                  | 17-hydroxyprogesterone    |
| THA                                                    | 5 $\beta$ -Pregnane-3 $\alpha$ ,21-diol-11,20-dione                                        | Corticosterone            |
| THF                                                    | 5 $\beta$ -Pregnane-3 $\alpha$ ,11 $\beta$ ,17,21-tetrol-20-one<br>(Tetrahydro-Cortisol)   | cortisol                  |
| F                                                      | 4-Pregnene-11 $\beta$ ,17,21-triol-3,20-dione<br>(Cortisol)                                | cortisol                  |
| 6 $\beta$ -OH-F                                        | 4-Pregnene-6 $\beta$ ,11 $\beta$ ,17,21-tetrol-3,20-dione                                  | cortisol                  |
| 20 $\alpha$ -DHF                                       | 4-Pregnene-11 $\beta$ ,17,20 $\alpha$ ,21-tetrol-3-one                                     | cortisol                  |
| 11-O-An                                                | 5 $\alpha$ -androstane-3 $\alpha$ -ol-11,17-dione                                          | 11-hydroxyandrostenedione |
| 11-OH-An                                               | 5 $\alpha$ -Androstane-3 $\alpha$ ,11 $\beta$ -diol-17-one                                 | 11-hydroxyandrostenedione |
| THE                                                    | 5 $\beta$ -Pregnane-3 $\alpha$ ,17,21-triol-11,20-dione<br>(Tetrahydro-Cortisone)          | cortisone                 |
| $\alpha$ -Cl                                           | 5 $\beta$ -Pregnane-3 $\alpha$ ,17,20 $\alpha$ ,21-tetrol-11-one<br>( $\alpha$ -Cortolone) | cortisone                 |
| 6 $\alpha$ -OH-THE                                     | 5 $\beta$ -Pregnane-3 $\alpha$ ,6 $\alpha$ ,17,21-tetrol-11,20-dione                       | cortisone                 |
| 1 $\beta$ -OH-THE                                      | 5 $\beta$ -Pregnane-1 $\beta$ ,3 $\alpha$ ,17,21-tetrol-11,20-dione                        | cortisone                 |
| $\beta$ -Cl                                            | 5 $\beta$ -Pregnane-3 $\alpha$ ,17,20 $\beta$ ,21-tetrol-11-one<br>( $\beta$ -Cortolone)   | cortisone                 |
| 6 $\alpha$ -OH- $\alpha$ -Cl                           | 5 $\beta$ -Pregnane-3 $\alpha$ ,6 $\alpha$ ,17,20 $\alpha$ ,21-pentol-11-one               | cortisone                 |
| 6 $\alpha$ -OH- $\beta$ -Cl                            | 5 $\beta$ -Pregnane-3 $\alpha$ ,6 $\beta$ ,17,20 $\beta$ ,21-pentol-11-one                 | cortisone                 |
| 1 $\beta$ -OH- $\beta$ -Cl                             | 5 $\beta$ -Pregnane-1 $\beta$ ,3 $\alpha$ ,17,20 $\beta$ ,21-pentol-11-one                 | cortisone                 |
| A5-3 $\beta$ ,17 $\alpha$                              | 5-Androstene-3 $\beta$ ,17 $\alpha$ -diol                                                  | DHEA                      |
| DHEA                                                   | 5-Androstene-3 $\beta$ -ol-17-one<br>(Dehydroepiandrosterone)                              | DHEA                      |
| Adiol                                                  | 5-Androstene-3 $\beta$ ,17 $\beta$ -diol                                                   | DHEA                      |
| 16 $\alpha$ -OH-DHEA                                   | 5-Androstene-3 $\beta$ ,16 $\alpha$ -diol-17-one                                           | DHEA                      |
| 16 $\beta$ -OH-DHEA                                    | 5-Androstene-3 $\beta$ ,16 $\beta$ -diol-17-one                                            | DHEA                      |
| 15 $\beta$ ,16 $\alpha$ OH-DHEA                        | 5-Androstene-3 $\beta$ ,15 $\beta$ ,16 $\alpha$ -triol-17-one                              | DHEA                      |
| 16-O-A5D                                               | 5-Androstene-3 $\beta$ ,17 $\beta$ -diol-16-one                                            | DHEA                      |
| A5T16 $\alpha$                                         | 5-Androstene-3 $\beta$ ,16 $\alpha$ ,17 $\beta$ -triol<br>(Androstenetriol-16 $\alpha$ )   | DHEA                      |
| A5T-16 $\beta$                                         | 5-Androstene-3 $\beta$ ,16 $\beta$ ,17 $\beta$ -triol                                      | DHEA                      |
| 16 $\alpha$ ,18OH-DHEA                                 | 5-Androstene-3 $\beta$ ,16 $\alpha$ ,18-triol-17-one                                       | DHEA                      |
| A5-3 $\beta$ 16 $\alpha$ 17 $\beta$ 18-tetrol          | 5-androstene-3 $\beta$ ,16 $\alpha$ ,17 $\beta$ ,18-tetrole                                | DHEA                      |
| A5-3 $\beta$ 15 $\beta$ 16 $\alpha$ 17 $\beta$ -tetrol | 5-androstene-3 $\beta$ ,15 $\beta$ ,16 $\alpha$ ,17 $\beta$ -tetrole                       | DHEA                      |
| 16OHP5o                                                | 5-Pregnene-3 $\beta$ ,16 $\alpha$ -diol-20-one                                             | Pregnenolone              |
| 21OHP5o                                                | 5-Pregnene-3 $\beta$ ,21-diol-20-one                                                       | Pregnenolone              |
| P5-3 $\beta$ 20 $\alpha$ 21-triol                      | 5-Pregnene-3 $\beta$ ,20 $\alpha$ ,21-triol                                                | Pregnenolone              |
| P5-tetrol                                              | 5-Pregnene-3 $\beta$ ,16 $\alpha$ ,20 $\alpha$ ,21-tetrole                                 | Pregnenolone              |
